# Supplementary material for: Analogue of dynamic Hall effect in cavity magnon polariton system and coherently controlled logic device
Source: PubMed Central journal article supplement (PMC6610622; doi:10.1038/s41467-019-11021-2), 2019-07-03
Supplement: 41467_2019_11021_MOESM1_ESM.pdf [file 41467_2019_11021_MOESM1_ESM.pdf]

## **Supplementary Information**

### **Analogue of dynamic Hall effect in cavity magnon polariton system and coherently controlled logic device**

Rao et al.

#### **This PDF file includes:**

**Supplementary Note 1:** Theoretical description of magnon-photon coupling in x-cavity

**Supplementary Note 2:** Input-output relations

**Supplementary Note 3:** Transmission of X-CMP dynamics

**Supplementary References**

## Supplementary Note 1. Theoretical description of magnon-photon coupling in x-cavity

### Hamiltonian of X-CMP dynamics

The whole system can be viewed as a coupled cavity magnon system in a photon bath. The Hamiltonian of the whole system has the following form:

$$H = H_{sys} + H_{bath} + H_{int} \quad (1)$$

Here,  $H_{sys}$  is the Hamiltonian of the coupled cavity magnon system isolated with surroundings, and  $H_{bath}$  is the Hamiltonian of the photon bath. As for the  $H_{int}$ , it represents the interaction effect between the coupled cavity magnon system and the photon bath. The detailed expressions of these three parts are shown as following:

$$H_{sys} = \hbar\omega_c a_x^\dagger a_x + \hbar\omega_m m^\dagger m + \hbar\omega_c a_y^\dagger a_y + \hbar\Omega_0(m^\dagger a_x + m a_x^\dagger) + \hbar\Omega_0(m^\dagger a_y + m a_y^\dagger) \quad (2)$$

$$H_{bath} = \int \hbar\omega_k \sum_{r=A}^D (p_{k,r}^\dagger p_{k,r} + \frac{1}{2}) dk \quad (3)$$

$$H_{int} = \int i\hbar\lambda [(p_{k,A} a_x^\dagger - p_{k,A}^\dagger a_x) + (p_{k,C} a_x^\dagger - p_{k,C}^\dagger a_x) + (p_{k,B} a_y^\dagger - p_{k,B}^\dagger a_y) + (p_{k,D} a_y^\dagger - p_{k,D}^\dagger a_y)] dk \quad (4)$$

$a_x(a_x^\dagger)$ ,  $a_y(a_y^\dagger)$  represent the annihilation (creation) operators of X-cavity modes in x- and y- directions.  $m(m^\dagger)$  is the annihilation (creation) operator of the magnon.  $p_{k,r}(p_{k,r}^\dagger)$  is the annihilation (creation) operator of the photon with wave vector  $k$ , while the subscript index  $r=A,B,C,D$  corresponds to the port A,B,C,D respectively.

### The equation motion for the extra-cavity photon

The equation of motion for the extra-cavity photon operator in Heisenberg representation reads

$$\frac{dp_{k,A}}{dt} = -\frac{i}{\hbar} [p_{k,A}, H] = -i\omega_k p_{k,A} - \lambda a_x \quad (5)$$

The solution of this dynamic equation can be formally written as

$$p_{k,A}(t) = e^{-i\omega_k(t-t_0)} p_{k,A}(t_0) - \lambda \int_{t_0}^t e^{-i\omega_k(t-t')} a_x(t') dt' \quad (6)$$

Analogously, we can also get the expressions of the photon operators for the other three ports:

$$p_{k,C}(t) = e^{-i\omega_k(t-t_0)} p_{k,C}(t_0) - \lambda \int_{t_0}^t e^{-i\omega_k(t-t')} a_x(t') dt' \quad (7)$$

$$p_{k,B}(t) = e^{-i\omega_k(t-t_0)} p_{k,B}(t_0) - \lambda \int_{t_0}^t e^{-i\omega_k(t-t')} a_y(t') dt' \quad (8)$$

$$p_{k,D}(t) = e^{-i\omega_k(t-t_0)} p_{k,D}(t_0) - \lambda \int_{t_0}^t e^{-i\omega_k(t-t')} a_y(t') dt' \quad (9)$$

### The equation motion for the intra-cavity photon

Similar to Supplementary equation (5), we can write the equations of motion for the two orthogonal X-cavity modes in the Heisenberg representation.

$$\frac{da_x}{dt} = -\frac{i}{\hbar} [a_x, H_{sys}] + \int_0^\infty \lambda p_{k,A} dk + \int_0^\infty \lambda p_{k,C} dk \quad (10)$$

$$\frac{da_y}{dt} = -\frac{i}{\hbar} [a_y, H_{sys}] + \int_0^\infty \lambda p_{k,B} dk + \int_0^\infty \lambda p_{k,D} dk \quad (11)$$

By substituting  $H_{sys}$  and Supplementary equation (6)-(9) into Supplementary equation (10) and (11), we obtain a new form of equations of motion for x- and y- directions, respectively.

$$-i\omega a_x = -i\omega_c a_x - i\Omega_0 m + \sqrt{2\kappa_p}(p_A^{in} + p_C^{in}) - 2\kappa_p a_x \quad (12)$$

$$-i\omega a_y = -i\omega_c a_y - i\Omega_0 m + \sqrt{2\kappa_p}(p_B^{in} + p_D^{in}) - 2\kappa_p a_y \quad (13)$$

where  $\kappa_p$  is the coupling strength between feedlines and X-cavity, which follows the relation  $\sqrt{\kappa_p} = \sqrt{\pi}\lambda$ .

### Supplementary Note 2. Input-output relations

The extra-cavity asymptotic output operators at  $t = +\infty$  can be related to the input operators at  $t_0 = -\infty$  and the cavity photon ones through a linear relationship<sup>1,2</sup>. The standard definitions of the input and output photons are  $p_{k,r}^{in} = p_{k,r}(t_0)e^{i\omega_k(t_0)}$  and  $p_{k,r}^{out} = p_{k,r}(t)e^{i\omega_k(t)}$ . By substituting them into Supplementary equation (6)-(9), we can get the response formula of the photon with wave vector  $k$  at each port, shown below

$$p_{k,r}^{out} = p_{k,r}^{in} - \sqrt{2\pi}\lambda a(\omega_k) \quad (14)$$

Here, the  $a(\omega_k)$  is the Fourier Transformation of  $a_x(t')$  or  $a_y(t')$  depending on the port number,  $r$ .

$$a(\omega_k) = \frac{1}{\sqrt{2\pi}} \int_{-\infty}^{\infty} e^{i\omega_k t'} a(t') dt' \quad (15)$$

The input and output signals are the sum of photons with different wave vectors i.e. the wave packets. Therefore, we define the input and output wave packets as

$$p_r^{in} = \frac{1}{\sqrt{2\pi}} \int_0^{\infty} e^{-i\omega_k t} p_{k,r}^{in} dk \quad (16)$$

$$p_r^{out} = \frac{1}{\sqrt{2\pi}} \int_0^{\infty} e^{-i\omega_k t} p_{k,r}^{out} dk \quad (17)$$

Substituting these two definitions into the Supplementary equation (14) and transferring  $a_r(\omega_k)$  from the frequency domain back to the time domain  $a(t)$ , we can obtain the input-output relation as

$$p_r^{out} = p_r^{in} - \sqrt{2\pi}\lambda a(t) \quad (18)$$

### Supplementary Note 3. Transmission of X-CMP dynamics

Start from the dynamic equation of magnon in Heisenberg representation

$$\begin{aligned} \frac{dm}{dt} &= -\frac{i}{\hbar}[m, H_{sys}] \\ &= -i\omega_m m - i\Omega_0(a_x + a_y) \end{aligned} \quad (19)$$

If we assume the solution of this equation follows the general form as  $m = |m|e^{-i\omega t}$ , then Supplementary equation (19) should be:

$$(\omega - \omega_m)m = \Omega_0(a_x + a_y) \quad (20)$$

Now, we put the intrinsic damping of the magnon into this equation i.e.  $\omega_m \rightarrow \omega_m - i\alpha\omega_m$ , then Supplementary equation (20) becomes

$$(\omega - \omega_m + i\alpha\omega_m)m = \Omega_0(a_x + a_y) \quad (21)$$

In experiment, for general assumption, the port A and port C are the input ports, and the port B and port D are output ports. Under this condition, we can set  $p_C^{in}$  and  $p_D^{in}$  as zero and obtain the equations of motion of the coupled cavity magnon system in the cross cavity as following:

$$\begin{aligned}
[\omega - \omega_c + i(\beta_{in}\omega_c + 2\kappa_p)]a_x - \Omega_0 m &= i\sqrt{2\kappa_p}p_A^{in} \\
[\omega - \omega_c + i(\beta_{in}\omega_c + 2\kappa_p)]a_y - \Omega_0 m &= i\sqrt{2\kappa_p}p_B^{in} \\
(\omega - \omega_m + i\alpha\omega_m)m - \Omega_0(a_x + a_y) &= 0
\end{aligned} \tag{22}$$

Here,  $\beta_{in}\omega_c$  is the intrinsic damping of the cavity. We can also use a lumped damping factor  $\beta$  to represent the loaded damping of the cavities, i.e.  $\beta\omega_c = \beta_{in}\omega_c + 2\kappa_p$ .

### Dynamics hall effect in X-CMP

Firstly, if we only input microwave power at port A. As a result, input condition can be simplified as  $p_A^{in} = \tilde{V}_x^{in}$  and  $p_B^{in} = 0$ , using Supplementary equation (22), we get the expressions of  $a_x$  and  $a_y$  in the frequency domain as:

$$\begin{aligned}
a_x &= -\frac{\sqrt{2\kappa_p}\tilde{V}_x^{in}}{i(\omega - \omega_c) - \beta\omega_c + \frac{\Omega_0^2}{i(\omega - \omega_m) - \alpha\omega_m + \frac{\Omega_0^2}{i(\omega - \omega_c) - \beta\omega_c}}} \\
a_y &= a_x + \frac{\sqrt{2\kappa_p}\tilde{V}_x^{in}}{i(\omega - \omega_c) - \beta\omega_c}
\end{aligned} \tag{23}$$

Substituting these two expressions into Supplementary equation (18), we get the output signals from the port C and port D, respectively, i.e.  $p_C^{out} = \tilde{V}_x^{out} = -\sqrt{2\kappa_p}a_x$  and  $p_D^{out} = \tilde{V}_y^{out} = -\sqrt{2\kappa_p}a_y$ :

$$\begin{aligned}
\tilde{V}_x^{out} &= \frac{2\kappa_p\tilde{V}_x^{in}}{i(\omega - \omega_c) - \beta\omega_c + \frac{\Omega_0^2}{i(\omega - \omega_m) - \alpha\omega_m + \frac{\Omega_0^2}{i(\omega - \omega_c) - \beta\omega_c}}} \\
\tilde{V}_y^{out} &= \frac{2\kappa_p\tilde{V}_x^{in}}{i(\omega - \omega_c) - \beta\omega_c + \frac{\Omega_0^2}{i(\omega - \omega_m) - \alpha\omega_m + \frac{\Omega_0^2}{i(\omega - \omega_c) - \beta\omega_c}}} - \frac{2\kappa_p\tilde{V}_x^{in}}{i(\omega - \omega_c) - \beta\omega_c}
\end{aligned} \tag{24}$$

Because of the geometric symmetry of our device, it's straightforward to draw a conclusion that if signal was input from port B i.e.  $p_A^{in} = 0$  and  $p_B^{in} = \tilde{V}_y^{in}$ , we can also observe the normal transmission signal and the dynamic Hall signal from the port C and port D, respectively. By means of this symmetric property, we have transformed supplementary equation (24) into a matrix equation which is shown as:

$$\frac{1}{2\kappa_p} \begin{bmatrix} i(\omega - \omega_c) - \beta\omega_c + \frac{\Omega_0^2}{i(\omega - \omega_m) - \alpha\omega_m} & \frac{\Omega_0^2}{i(\omega - \omega_m) - \alpha\omega_m} \\ \frac{\Omega_0^2}{i(\omega - \omega_m) - \alpha\omega_m} & i(\omega - \omega_c) - \beta\omega_c + \frac{\Omega_0^2}{i(\omega - \omega_m) - \alpha\omega_m} \end{bmatrix} \begin{bmatrix} \tilde{V}_x^{out} \\ \tilde{V}_y^{out} \end{bmatrix} = \begin{bmatrix} \tilde{V}_x^{in} \\ \tilde{V}_y^{in} \end{bmatrix} \tag{25}$$

To better describe the dynamic Hall effect, this matrix equation has been transformed into a much more straightforward form:

$$\begin{pmatrix} \tilde{V}_x^{out} \\ \tilde{V}_y^{out} \end{pmatrix} = 2\kappa_p \frac{\hat{T}}{\det(\hat{T})} \begin{pmatrix} \tilde{V}_x^{in} \\ \tilde{V}_y^{in} \end{pmatrix} \tag{26}$$

Here,  $\hat{T}$  is the dynamic Hall tensor in X-CMP system, which plays an important role in controlling the direction of polariton flow. The detail of  $\hat{T}$  is shown below as

$$\hat{T} = \begin{bmatrix} i(\omega - \omega_c) - \beta\omega_c + \frac{\Omega_0^2}{i(\omega - \omega_m) - \alpha\omega_m} & -\frac{\Omega_0^2}{i(\omega - \omega_m) - \alpha\omega_m} \\ -\frac{\Omega_0^2}{i(\omega - \omega_m) - \alpha\omega_m} & i(\omega - \omega_c) - \beta\omega_c + \frac{\Omega_0^2}{i(\omega - \omega_m) - \alpha\omega_m} \end{bmatrix} \tag{27}$$

with the denominator  $\det(\hat{T})$  as,

$$\det(\hat{T}) = [i(\omega - \omega_c) - \beta\omega_c]^2 + \frac{2\Omega_0^2[i(\omega - \omega_c) - \beta\omega_c]}{i(\omega - \omega_m) - \alpha\omega_m} \quad (28)$$

Because of the non-zero off-diagonal terms of the transfer matrix, the Hall signal is generated in the experiment. And since these off-diagonal terms exhibit a resonance response of the external magnetic field, the dynamic Hall signal can be modulated by the external field. We have shown a detailed description of the dynamic Hall signal in the manuscript.

### Two-port input experiment

The second step of our experiment is the Two-port input experiment. The input signal is  $\tilde{V}^{in}$ , and we split it into two branches with same amplitude. A mechanical phase shifter was added into one branch to induce a phase difference between the two coherent signals ( $\Phi$ ). Then, these two signals were injected into the cross cavity from port A and port B, simultaneously. In theory, they can be described as:

$$\begin{aligned} p_A^{in} &= \tilde{V}_x^{in} = \tilde{V}^{in}/\sqrt{2} \\ p_B^{in} &= \tilde{V}_y^{in} = ie^{i\Phi}\tilde{V}^{in}/\sqrt{2} \end{aligned} \quad (29)$$

By substituting these two input signals into Supplementary equation (26), it's straightforward to obtain the output signal from port C:

$$\tilde{V}_C = \sqrt{2}\kappa_p(T_{xx} + ie^{i\Phi}T_{xy})\tilde{V}^{in}/\det(\hat{T}) \quad (30)$$

And the spectra of the output signal in frequency domain is:

$$\tilde{V}_C = \frac{\sqrt{2}\kappa_p\tilde{V}^{in}}{i(\omega - \omega_c) - \beta\omega_c + \frac{(1+ie^{i\Phi})\Omega_0^2}{i(\omega - \omega_m) - \alpha\omega_m + \frac{(1-ie^{i\Phi})\Omega_0^2}{i(\omega - \omega_c) - \beta\omega_c}}} \quad (31)$$

---

### Supplementary References

- <sup>1</sup> Ciuti, C., & Carusotto, I., Input-output theory of cavities in the ultrastrong coupling regime: The case of time-independent cavity parameters, *Phys. Rev. A* **74**, 033811 (2006).
- <sup>2</sup> Clerk, A. A., Devoret, M. H., Girvin, S. M., Marquardt, F. & Schoelkopf, R. J. Introduction to quantum noise, measurement, and amplification. *Rev. Mod. Phys.* **82**, 11551208 (2010).
